# Supplementary material
Source: PubMed Central journal article supplement (PMC8283689)
Supplement: NIHMS1699028-supplement-Supplement1.pdf [file NIHMS1699028-supplement-Supplement1.pdf]

**Supplementary Material for:**

**Integrative computational approaches to inform relative bioaccumulation potential of per-  
and polyfluoroalkyl substances (PFAS) across species**

Weixiao Cheng<sup>1</sup>, Jon A. Doering<sup>2</sup>, Carlie LaLone<sup>3\*</sup>, and Carla Ng<sup>1,4\*</sup>

<sup>1</sup>Civil and Environmental Engineering, University of Pittsburgh, Pittsburgh, PA

<sup>2</sup>National Research Council, Duluth, MN

<sup>3</sup>Great Lakes Toxicology and Ecology Division, Center for Computational Toxicology and Exposure, Office of Research and Development, US Environmental Protection Agency, Duluth, MN

\*Co-corresponding authors

<sup>4</sup>Environmental and Occupational Health, University of Pittsburgh, Pittsburgh, PA

There are **19** pages, **8** figures and **9** tables included in the supplementary material.

|       |                                     |                             |    |                                                                                               |     |
|-------|-------------------------------------|-----------------------------|----|-----------------------------------------------------------------------------------------------|-----|
| Human | <input checked="" type="checkbox"/> | <a href="#">NP_001434.1</a> | 1  | MSFSGKYQLQSQENFEAFMKATIGLPEELIQKGDIKGVSEIVQNGKHF <sup>↓</sup> FTITAGSKVIQNEFTVGEECELETMTGEKVK | 80  |
| Rat   | <input checked="" type="checkbox"/> | <a href="#">NP_036688.1</a> | 1  | MNFSGKYQVQSQENFEPFMKAMGLPEDLIQKGDIKGVSEIVHEGKVKLTITITYGSKVIHNEFTLGEECELETMTGEKVK              | 80  |
| Human | <input checked="" type="checkbox"/> | <a href="#">NP_001434.1</a> | 81 | TVVQLEGDNKLVTTFKNIKSVTE <sup>↓</sup> LNGDIITNTMTLGDIVFKRISKRI                                 | 127 |
| Rat   | <input checked="" type="checkbox"/> | <a href="#">NP_036688.1</a> | 81 | AVVKMEGDNKMVTTFKGIKSVTE <sup>↓</sup> FNGDITNTMTLGDIVYKRVSKRI                                  | 127 |

**Figure S1.** Human LFABP aligned with Norway Rat LFABP. Blue text represents sequence differences in individual amino acids. Arrows indicate substitutions that would be predicted by SeqAPASS Level to lead to differences in chemical binding to LFABP based on differences in side chain classification and molecular weight differences in amino acids greater than 30 g/mol (Doering et al. 2018). Yellow arrows indicate the position of the amino acids where substitutions were most commonly identified across species.

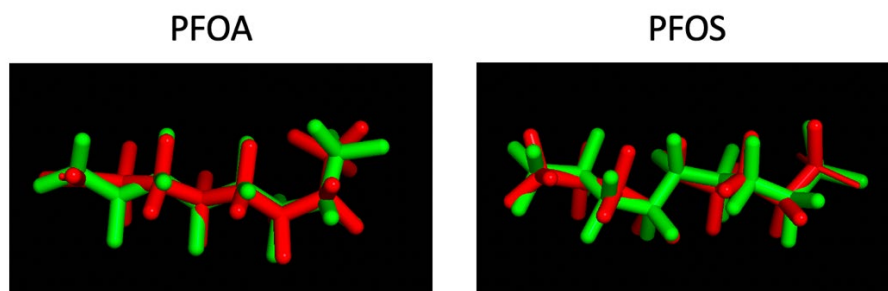

**Figure S2.** Comparison of 3-dimensional structures between experimentally determined structures (obtained from the Protein Data Bank, red color) and structures drawn in Avogadro (green color) for PFOA and PFOS. Structure alignment was generated with PyMOL (Schrodinger 2015).

**Human:**

>3STM\_1|Chain X|Fatty acid-binding protein, liver|Homo sapiens (9606)  
MAGSSFSGKYQLQSQENFEAFMKAIGLPEELIQKGKDIKGVSEIVQNGKHFKFTITAGSKVIQNEFTVGEECE  
LETMTGEKVKTVVQLEGDNKLVTTFKNIKSVTELNGDIITNTMTLGDIVFKRISKRIGT

**Rat:**

>1LFO\_1|Chain A|LIVER FATTY ACID BINDING PROTEIN|Rattus norvegicus (10116)  
XMNFSGKYQVQSQENFEPFMKAMGLPEDLIQKGKDIKGVSEIVHEGKKVCLTITYGSKVIHNEFTLGEECELE  
TMTGEKVKAVVKMEGDNKMVTTFKGIKSVTEFNGDTITNTMTLGDIVYKRVSKRI

**Chicken:**

>AAK58095.1 liver fatty acid binding protein [Gallus gallus]  
MSFTGKYELQSHENFEPFMKALGLPDDQIQKGKDIKSISEIVQNGNKFKITVTTGSKVMTNEFTIGEECE  
MELLTGEKAKCIVNMEGNKLVANLKGKLSVTELNGDTITHTMTKGDLYKRVSKRI

**Zebrafish:**

>NP\_001038177.1 fatty acid binding protein 1-A, liver [Danio rerio]  
MAFTGKYQLESHENFEPFMKAVGVPDDEVEKGDIKSISEIHQDQKDFKVTVTAGTKVILYSFTVGEECE  
LETFTGDRAKTVVQMDGNKLTAFVVKGIESVTELDGDTISNTLSFNGIVYKRISRIS

**Rainbow trout:**

>XP\_021446645.1 fatty acid-binding protein, liver [Oncorhynchus mykiss]  
MAFTGKYQLESQENFEPFMKAIGLPPDDLIQKGKDIKSVSEIEQNGDHFVKVTVTTGTKVMVNSFTVGQEA  
LETTLTGEKIKSTVNLVGNKLMVSLKGIKSVTEFNGDTIIATMMLGPIVYKRISKRI

**Japanese medaka:**

>XP\_004078356.1 fatty acid-binding protein, liver [Oryzias latipes]  
MDFNGTWQVYSQENYEEFLRALELSEDIKLAQDVKPVTEIKQGTGNDVITSKTPGRTVTNSFTIGKEAE  
ISTMDGKLLKCVVNMEGGKLVCKTGKFCVQEIKGGEMVETMTVGSTTLIRKSKM

**Fathead minnow:**

>ABG73404.1 liver fatty acid binding protein 10, partial [Pimephales promelas]  
VYLQENYEEFLPAIPLPEDIIKLAQDVKPVTEIQQKGNDFVITSKTPGKTVTNSFTVGKEAEITMDGK  
LKCIVKLEGGKLVNTERFVSHIQEIKGGEMVETLTVAGTTMVRKSKKI

**Figure S3.** Amino acid sequences for different species. The sequences can be downloaded from PDB website (<https://www.rcsb.org/>) for human and rat and from NCBI website (<https://www.ncbi.nlm.nih.gov/>) for other species.

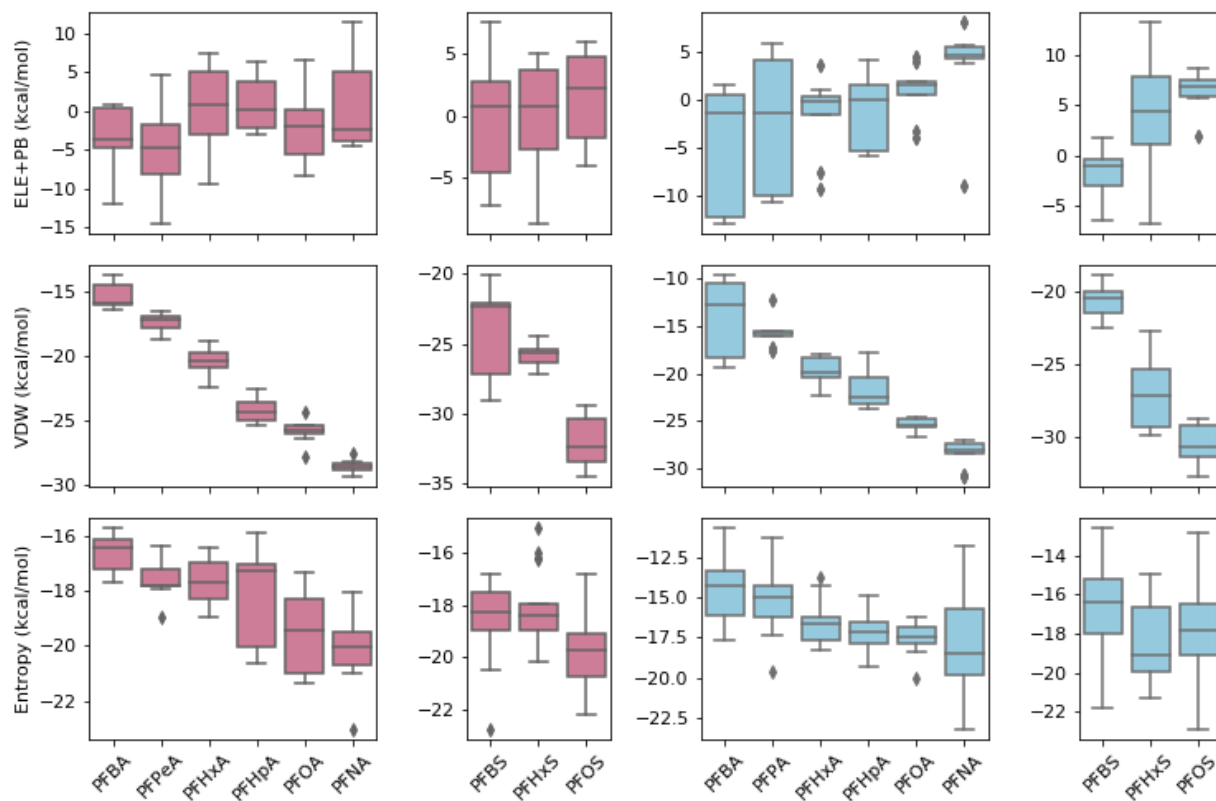

**Figure S4.** The distributions of the energy components of  $\Delta G_{\text{bind}}$  including the sum of electrostatic interactions and polar solvation free energy (ELE + PB), van der Waals energy (vdw), and entropy change upon binding. Pink represents the human LFABP system, while blue is the rat LFABP system.

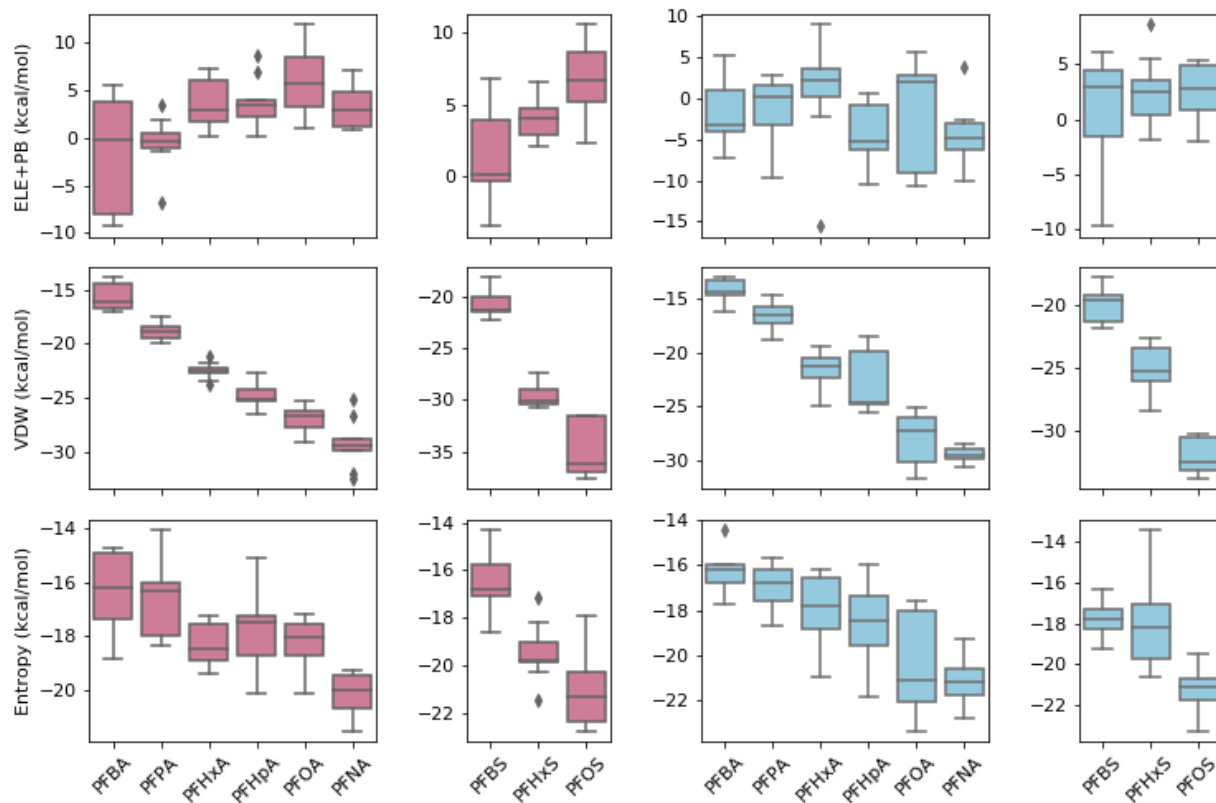

**Figure S5.** The distributions of the energy components of  $\Delta G_{\text{bind}}$  including the sum of electrostatic interactions and polar solvation free energy (ELE + PB), van der Waals energy (vdw), and entropy change upon binding. Pink represents the zebrafish LFABP system, while blue is the rainbow trout LFABP system.

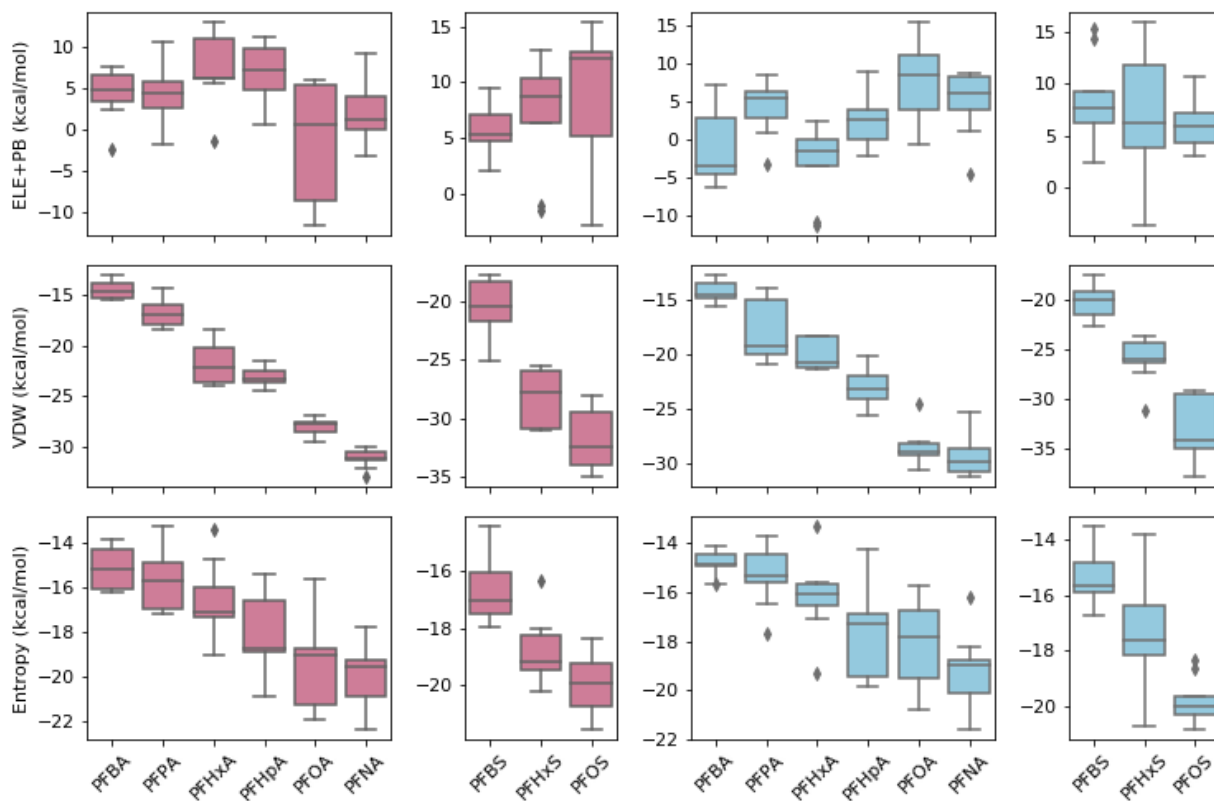

**Figure S6.** The distributions of the energy components of  $\Delta G_{\text{bind}}$  including the sum of electrostatic interactions and polar solvation free energy (ELE + PB), van der Waals energy (vdw), and entropy change upon binding. Pink represents the Japanese medaka LFABP system, while blue is the fathead minnow LFABP system.

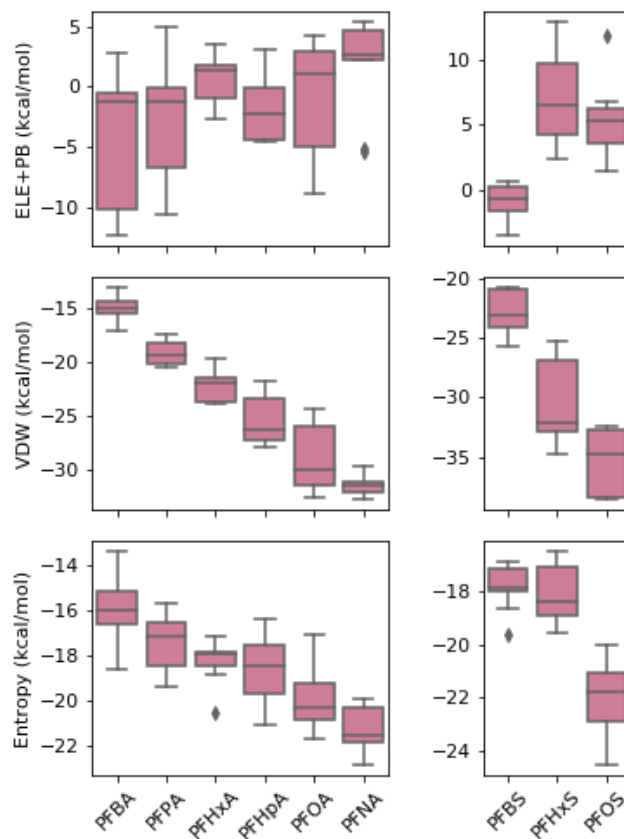

**Figure S7.** The distributions of the energy components of  $\Delta G_{\text{bind}}$  including the sum of electrostatic interactions and polar solvation free energy (ELE + PB), van der Waals energy (vdw), and entropy change upon binding for chicken LFABP system.



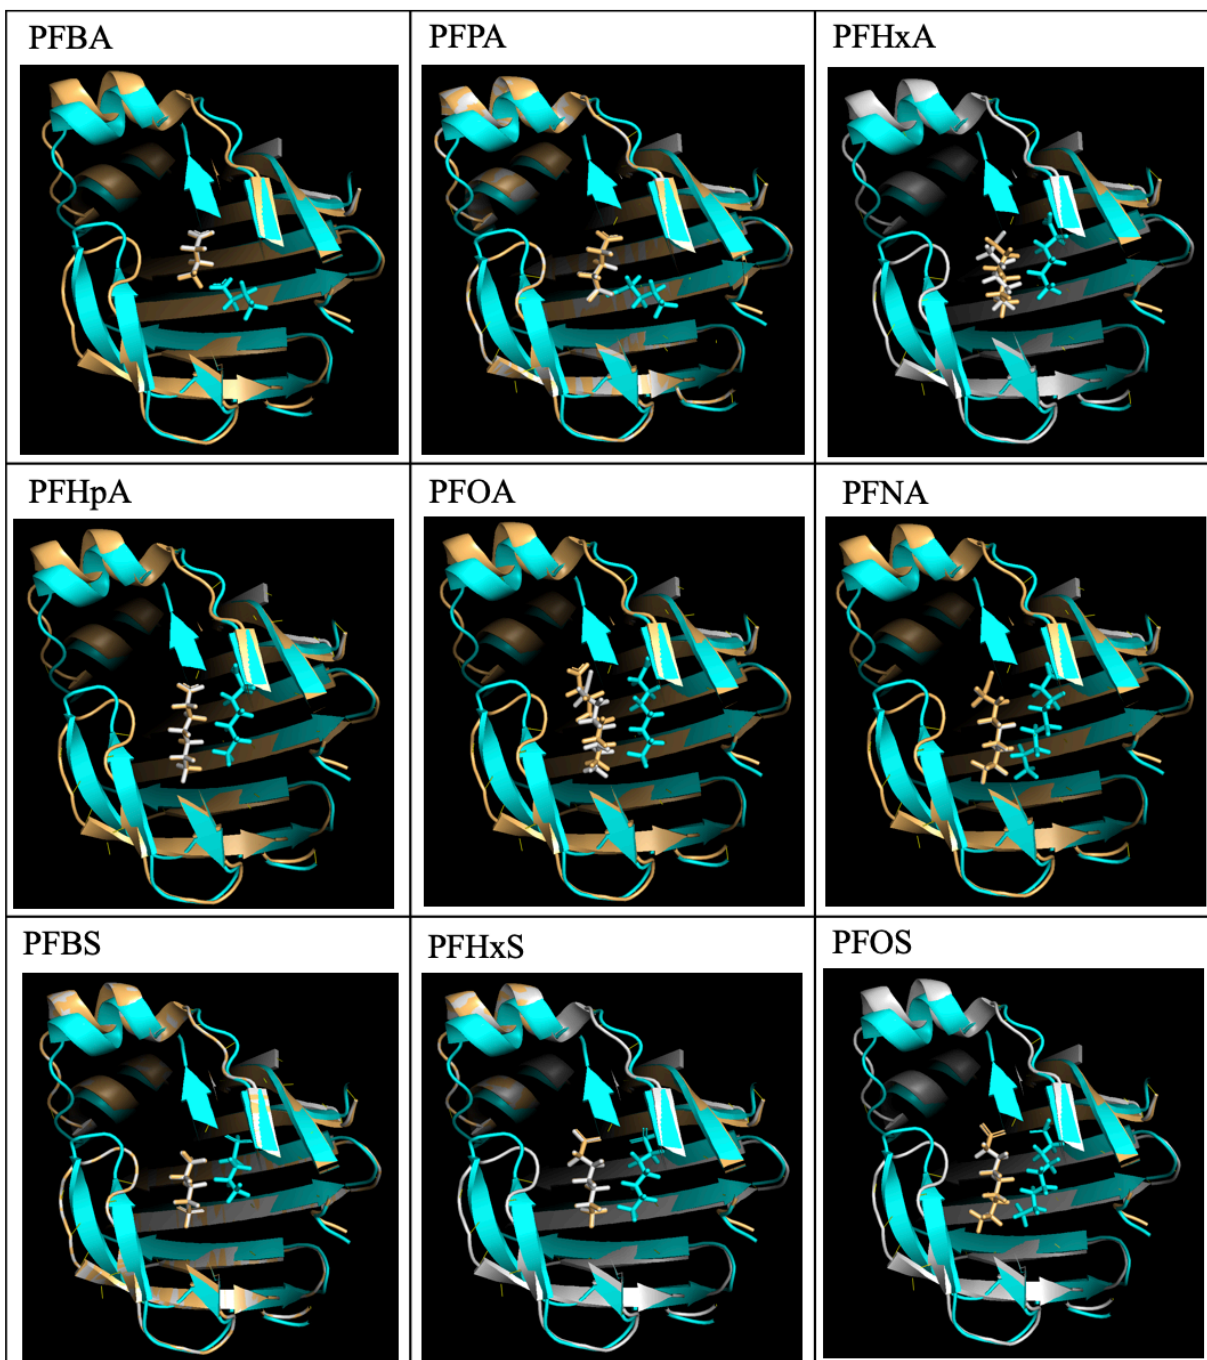

**Figure S8.** The PFAS binding poses for human (cyan color), Japanese medaka (orange color) and fathead minnow (grey color) LFABP after sequence alignment. The results were generated by Autodock vina (Trott and Olson 2010) and visualized with PyMOL (Schrodinger 2015)

**Table S1.** Links to EPA’s CompTox Chemicals Dashboard for all PFAS.

| <b>PFAS</b> | <b>Link to Dashboard</b>                                                                                                                                        |
|-------------|-----------------------------------------------------------------------------------------------------------------------------------------------------------------|
| PFBA        | <a href="https://comptox.epa.gov/dashboard/dsstoxdb/results?search=DTXSID4059916">https://comptox.epa.gov/dashboard/dsstoxdb/results?search=DTXSID4059916</a>   |
| PFPA        | <a href="https://comptox.epa.gov/dashboard/dsstoxdb/results?search=DTXSID8059970">https://comptox.epa.gov/dashboard/dsstoxdb/results?search=DTXSID8059970</a>   |
| PFHxA       | <a href="https://comptox.epa.gov/dashboard/dsstoxdb/results?search=DTXSID3031862">https://comptox.epa.gov/dashboard/dsstoxdb/results?search=DTXSID3031862</a>   |
| PFHpA       | <a href="https://comptox.epa.gov/dashboard/dsstoxdb/results?search=DTXSID1037303">https://comptox.epa.gov/dashboard/dsstoxdb/results?search=DTXSID1037303</a>   |
| PFOA        | <a href="https://comptox.epa.gov/dashboard/dsstoxdb/results?search=DTXSID8031865">https://comptox.epa.gov/dashboard/dsstoxdb/results?search=DTXSID8031865</a>   |
| PFNA        | <a href="https://comptox.epa.gov/dashboard/dsstoxdb/results?search=DTXSID8031863">https://comptox.epa.gov/dashboard/dsstoxdb/results?search=DTXSID8031863</a>   |
| PFBS        | <a href="https://comptox.epa.gov/dashboard/dsstoxdb/results?search=DTXSID5030030">https://comptox.epa.gov/dashboard/dsstoxdb/results?search=DTXSID5030030</a>   |
| PFHxS       | <a href="https://comptox.epa.gov/dashboard/dsstoxdb/results?search=DTXSID80873012">https://comptox.epa.gov/dashboard/dsstoxdb/results?search=DTXSID80873012</a> |
| PFOS        | <a href="https://comptox.epa.gov/dashboard/dsstoxdb/results?search=DTXSID3031864">https://comptox.epa.gov/dashboard/dsstoxdb/results?search=DTXSID3031864</a>   |

**Table S2.** The mean and standard error (sterr) of  $\Delta G_{\text{bind}}$  and its five energy components calculated based on MM-PBSA for human LFABP (All values have units of kcal/mol).

| Ligand | van der Waals |       | Electrostatic |       | EPB    |       | Nonpolar |       | Entropy |       | Delta G |       |
|--------|---------------|-------|---------------|-------|--------|-------|----------|-------|---------|-------|---------|-------|
|        | mean          | sterr | mean          | sterr | mean   | sterr | mean     | sterr | mean    | sterr | mean    | sterr |
| PFBA   | -15.337       | 0.315 | -78.824       | 6.356 | 75.159 | 5.391 | -2.003   | 0.013 | -16.616 | 0.203 | -4.393  | 1.545 |
| PFPA   | -17.460       | 0.218 | -99.408       | 4.396 | 94.660 | 2.832 | -2.253   | 0.015 | -17.609 | 0.226 | -6.851  | 1.773 |
| PFHxA  | -20.558       | 0.334 | -78.300       | 7.409 | 78.159 | 5.698 | -2.586   | 0.020 | -17.730 | 0.296 | -5.553  | 1.651 |
| PFHpA  | -24.340       | 0.295 | -69.928       | 3.429 | 71.008 | 3.918 | -2.828   | 0.026 | -18.214 | 0.574 | -7.872  | 0.953 |
| PFOA   | -25.872       | 0.289 | -98.968       | 3.093 | 97.117 | 1.977 | -3.187   | 0.017 | -19.564 | 0.509 | -11.344 | 1.100 |
| PFNA   | -28.597       | 0.170 | -95.384       | 3.393 | 95.901 | 1.800 | -3.510   | 0.017 | -20.133 | 0.436 | -11.454 | 1.724 |
| PFBS   | -23.959       | 0.740 | -90.748       | 4.010 | 90.734 | 3.459 | -2.436   | 0.014 | -18.507 | 0.328 | -7.901  | 1.875 |
| PFHxS  | -25.756       | 0.196 | -88.319       | 2.010 | 88.321 | 1.226 | -3.016   | 0.009 | -18.117 | 0.311 | -10.651 | 0.905 |
| PFOS   | -31.966       | 0.418 | -88.897       | 2.414 | 90.629 | 1.702 | -3.578   | 0.015 | -19.821 | 0.316 | -13.989 | 1.102 |

**Table S3.** The mean and standard error (sterr) of  $\Delta G_{\text{bind}}$  and its five energy components calculated based on multi-step molecular modeling for rat LFABP (All values have units of kcal/mol)

| Ligand | van der Waals |       | Electrostatic |       | EPB     |       | Nonpolar |       | Entropy |       | Delta G |       |
|--------|---------------|-------|---------------|-------|---------|-------|----------|-------|---------|-------|---------|-------|
|        | mean          | sterr | mean          | sterr | mean    | sterr | mean     | sterr | mean    | sterr | mean    | sterr |
| PFBA   | -13.870       | 0.854 | -98.032       | 5.124 | 93.354  | 3.998 | -1.859   | 0.036 | -14.387 | 0.473 | -6.019  | 1.347 |
| PFPA   | -15.723       | 0.341 | -95.694       | 5.151 | 93.729  | 4.024 | -2.232   | 0.042 | -15.067 | 0.484 | -4.853  | 1.493 |
| PFHxA  | -19.640       | 0.322 | -100.333      | 2.888 | 98.757  | 2.202 | -2.608   | 0.011 | -16.584 | 0.303 | -7.241  | 0.877 |
| PFHpA  | -21.700       | 0.467 | -102.699      | 2.352 | 101.938 | 1.536 | -2.937   | 0.017 | -17.191 | 0.313 | -8.206  | 0.443 |
| PFOA   | -25.480       | 0.160 | -105.327      | 1.324 | 106.190 | 0.973 | -3.208   | 0.008 | -17.481 | 0.206 | -10.344 | 0.619 |
| PFNA   | -28.430       | 0.315 | -104.583      | 3.227 | 108.249 | 2.335 | -3.496   | 0.011 | -18.032 | 0.637 | -10.226 | 0.961 |
| PFBS   | -20.629       | 0.255 | -101.672      | 1.512 | 99.922  | 1.112 | -2.464   | 0.007 | -16.659 | 0.511 | -8.184  | 0.721 |
| PFHxS  | -26.840       | 0.568 | -101.733      | 2.094 | 105.687 | 1.217 | -3.072   | 0.017 | -18.389 | 0.438 | -7.572  | 1.202 |
| PFOS   | -30.561       | 0.312 | -92.358       | 1.409 | 98.837  | 1.193 | -3.636   | 0.012 | -17.759 | 0.539 | -9.959  | 0.531 |

**Table S4.** The mean and standard error (sterr) of  $\Delta G_{\text{bind}}$  and its five energy components calculated based on multi-step molecular modeling for chicken LFABP (All values have units of kcal/mol).

| Ligand | van der Waals |       | Electrostatic |       | EPB     |       | Nonpolar |       | Entropy |       | Delta G |       |
|--------|---------------|-------|---------------|-------|---------|-------|----------|-------|---------|-------|---------|-------|
|        | mean          | sterr | mean          | sterr | mean    | sterr | mean     | sterr | mean    | sterr | mean    | sterr |
| PFBA   | -15.080       | 0.370 | -89.077       | 6.489 | 85.431  | 4.802 | -2.083   | 0.015 | -15.911 | 0.461 | -4.893  | 1.310 |
| PFPA   | -19.259       | 0.335 | -89.921       | 2.681 | 86.956  | 2.075 | -2.317   | 0.028 | -17.488 | 0.388 | -7.054  | 1.450 |
| PFHxA  | -22.217       | 0.436 | -87.180       | 2.664 | 87.671  | 2.362 | -2.576   | 0.021 | -18.258 | 0.317 | -6.044  | 0.578 |
| PFHpA  | -25.641       | 0.719 | -101.372      | 2.468 | 99.681  | 2.123 | -2.886   | 0.014 | -18.628 | 0.510 | -11.589 | 0.972 |
| PFOA   | -28.928       | 1.014 | -99.812       | 3.446 | 98.859  | 1.946 | -3.100   | 0.034 | -19.986 | 0.460 | -12.996 | 2.292 |
| PFNA   | -31.472       | 0.295 | -96.261       | 3.758 | 98.007  | 2.687 | -3.479   | 0.034 | -21.250 | 0.298 | -11.953 | 1.528 |
| PFBS   | -22.807       | 0.638 | -81.700       | 2.544 | 80.894  | 2.543 | -2.459   | 0.020 | -17.850 | 0.275 | -8.221  | 0.462 |
| PFHxS  | -30.382       | 1.097 | -81.564       | 2.668 | 88.767  | 2.557 | -3.020   | 0.022 | -18.067 | 0.339 | -8.136  | 1.503 |
| PFOS   | -35.583       | 0.862 | -94.822       | 1.821 | 100.076 | 1.477 | -3.589   | 0.012 | -21.998 | 0.454 | -11.913 | 0.943 |

**Table S5.** The mean and standard error (sterr) of  $\Delta G_{\text{bind}}$  and its five energy components calculated based on multi-step molecular modeling for zebrafish LFABP (All values have units of kcal/mol).

| Ligand | van der Waals |       | Electrostatic |       | EPB     |       | Nonpolar |       | Entropy |       | Delta G |       |
|--------|---------------|-------|---------------|-------|---------|-------|----------|-------|---------|-------|---------|-------|
|        | mean          | sterr | mean          | sterr | mean    | sterr | mean     | sterr | mean    | sterr | mean    | sterr |
| PFBA   | -15.750       | 0.402 | 28.159        | 7.956 | -29.751 | 6.489 | -2.069   | 0.020 | -16.284 | 0.463 | -3.128  | 1.742 |
| PFPA   | -18.850       | 0.251 | 39.594        | 4.171 | -40.091 | 3.568 | -2.316   | 0.018 | -16.676 | 0.464 | -4.984  | 1.323 |
| PFHxA  | -22.507       | 0.249 | 38.133        | 2.499 | -34.534 | 2.152 | -2.649   | 0.018 | -18.302 | 0.258 | -3.253  | 0.805 |
| PFHpA  | -24.731       | 0.331 | 33.366        | 2.102 | -29.816 | 1.595 | -2.977   | 0.015 | -17.821 | 0.469 | -6.340  | 0.855 |
| PFOA   | -26.941       | 0.361 | 30.680        | 2.718 | -24.814 | 2.070 | -3.242   | 0.029 | -18.299 | 0.328 | -6.021  | 0.967 |
| PFNA   | -29.276       | 0.716 | 34.033        | 2.961 | -30.606 | 2.845 | -3.508   | 0.013 | -20.203 | 0.244 | -9.152  | 0.936 |
| PFBS   | -20.687       | 0.461 | 31.353        | 2.510 | -29.753 | 1.544 | -2.547   | 0.008 | -16.583 | 0.388 | -5.047  | 0.707 |
| PFHxS  | -29.532       | 0.368 | 30.416        | 1.212 | -26.363 | 1.306 | -3.084   | 0.020 | -19.389 | 0.387 | -9.179  | 0.696 |
| PFOS   | -34.882       | 0.830 | 29.460        | 2.971 | -22.782 | 2.290 | -3.593   | 0.023 | -20.904 | 0.499 | -10.896 | 0.578 |

**Table S6.** The mean and standard error (sterr) of  $\Delta G_{\text{bind}}$  and its five energy components calculated based on multi-step molecular modeling for rainbow trout LFABP (All values have units of kcal/mol).

| Ligand | van der Waals |       | Electrostatic |       | EPB    |       | Nonpolar |       | Entropy |       | Delta G |       |
|--------|---------------|-------|---------------|-------|--------|-------|----------|-------|---------|-------|---------|-------|
|        | mean          | sterr | mean          | sterr | mean   | sterr | mean     | sterr | mean    | sterr | mean    | sterr |
| PFBA   | -14.276       | 0.327 | -57.766       | 4.371 | 55.807 | 3.207 | -2.099   | 0.014 | -16.322 | 0.294 | -2.011  | 0.949 |
| PFPA   | -16.662       | 0.461 | -48.192       | 4.536 | 46.824 | 3.286 | -2.364   | 0.011 | -16.939 | 0.335 | -3.457  | 1.185 |
| PFHxA  | -21.787       | 0.619 | -56.374       | 6.261 | 57.190 | 4.129 | -2.629   | 0.013 | -17.908 | 0.498 | -5.692  | 1.782 |
| PFHpA  | -22.977       | 0.910 | -67.642       | 2.401 | 63.061 | 3.201 | -2.944   | 0.024 | -18.744 | 0.553 | -11.757 | 1.346 |
| PFOA   | -27.943       | 0.803 | -66.754       | 1.401 | 64.893 | 1.554 | -3.188   | 0.031 | -20.349 | 0.707 | -12.648 | 2.337 |
| PFNA   | -29.450       | 0.242 | -72.866       | 2.151 | 68.380 | 1.630 | -3.549   | 0.019 | -21.242 | 0.330 | -16.239 | 0.983 |
| PFBS   | -19.956       | 0.462 | -51.694       | 5.080 | 51.876 | 3.435 | -2.524   | 0.020 | -17.808 | 0.268 | -4.489  | 2.107 |
| PFHxS  | -25.224       | 0.621 | -53.624       | 2.378 | 56.066 | 1.878 | -3.046   | 0.031 | -17.901 | 0.709 | -7.929  | 0.869 |
| PFOS   | -32.020       | 0.447 | -61.322       | 3.479 | 63.863 | 3.025 | -3.712   | 0.010 | -21.273 | 0.333 | -11.917 | 1.174 |

**Table S7.** The mean and standard error (sterr) of  $\Delta G_{\text{bind}}$  and its five energy components calculated based on multi-step molecular modeling for Japanese medaka LFABP (All values have units of kcal/mol).

| Ligand | van der Waals |       | Electrostatic |       | EPB     |       | Nonpolar |       | Entropy |       | Delta G |       |
|--------|---------------|-------|---------------|-------|---------|-------|----------|-------|---------|-------|---------|-------|
|        | mean          | sterr | mean          | sterr | mean    | sterr | mean     | sterr | mean    | sterr | mean    | sterr |
| PFBA   | -14.443       | 0.306 | -96.134       | 4.624 | 100.474 | 4.249 | -2.077   | 0.017 | -15.138 | 0.306 | 2.957   | 1.102 |
| PFPA   | -16.827       | 0.404 | -109.589      | 7.659 | 113.956 | 6.520 | -2.357   | 0.017 | -15.743 | 0.443 | 0.928   | 1.044 |
| PFHxA  | -21.659       | 0.628 | -84.570       | 4.983 | 91.969  | 4.113 | -2.604   | 0.025 | -16.723 | 0.549 | -0.146  | 1.231 |
| PFHpA  | -23.079       | 0.310 | -90.961       | 5.366 | 97.976  | 4.458 | -2.891   | 0.028 | -18.227 | 0.603 | -0.726  | 0.841 |
| PFOA   | -28.012       | 0.288 | -120.780      | 6.687 | 119.353 | 4.557 | -3.187   | 0.017 | -19.640 | 0.647 | -12.987 | 2.029 |
| PFNA   | -31.103       | 0.301 | -115.243      | 1.287 | 117.661 | 1.802 | -3.443   | 0.014 | -20.020 | 0.455 | -12.111 | 0.986 |
| PFBS   | -20.567       | 0.776 | -105.128      | 3.250 | 110.857 | 2.954 | -2.520   | 0.017 | -16.629 | 0.363 | -0.728  | 0.557 |
| PFHxS  | -28.030       | 0.748 | -108.166      | 4.439 | 115.392 | 3.395 | -3.087   | 0.021 | -18.821 | 0.371 | -5.070  | 1.657 |
| PFOS   | -31.810       | 0.820 | -92.241       | 5.492 | 100.887 | 3.542 | -3.652   | 0.018 | -19.901 | 0.347 | -6.913  | 2.475 |



**Table S8.** The mean and standard error (sterr) of  $\Delta G_{\text{bind}}$  and its five energy components calculated based on multi-step molecular modeling for fathead minnow LFABP (All values have units of kcal/mol).

| Ligand | van der Waals |       | Electrostatic |       | EPB     |       | Nonpolar |       | Entropy |       | Delta G |       |
|--------|---------------|-------|---------------|-------|---------|-------|----------|-------|---------|-------|---------|-------|
|        | mean          | sterr | mean          | sterr | mean    | sterr | mean     | sterr | mean    | sterr | mean    | sterr |
| PFBA   | -14.316       | 0.301 | -91.722       | 5.484 | 90.793  | 4.150 | -2.084   | 0.015 | -14.833 | 0.177 | -2.496  | 1.749 |
| PFPA   | -18.124       | 0.879 | -81.094       | 2.779 | 85.300  | 1.829 | -2.277   | 0.011 | -15.249 | 0.395 | -0.948  | 0.678 |
| PFHxA  | -20.119       | 0.430 | -108.041      | 3.931 | 105.106 | 2.586 | -2.586   | 0.021 | -16.180 | 0.492 | -9.459  | 1.379 |
| PFHpA  | -23.071       | 0.538 | -107.604      | 7.773 | 110.399 | 6.784 | -2.910   | 0.018 | -17.564 | 0.579 | -5.622  | 1.021 |
| PFOA   | -28.539       | 0.518 | -87.569       | 5.625 | 95.450  | 4.402 | -3.146   | 0.026 | -18.109 | 0.556 | -5.699  | 1.410 |
| PFNA   | -29.193       | 0.684 | -102.104      | 3.904 | 107.124 | 3.131 | -3.436   | 0.030 | -19.339 | 0.517 | -8.271  | 1.761 |
| PFBS   | -20.219       | 0.582 | -72.659       | 3.592 | 81.052  | 2.761 | -2.404   | 0.021 | -15.253 | 0.320 | 1.024   | 0.966 |
| PFHxS  | -26.044       | 0.709 | -90.264       | 3.851 | 97.139  | 2.958 | -3.029   | 0.033 | -17.311 | 0.603 | -4.887  | 1.457 |
| PFOS   | -33.130       | 1.002 | -100.271      | 3.253 | 106.197 | 3.576 | -3.556   | 0.040 | -19.828 | 0.259 | -10.934 | 1.103 |

**Table S9.** The hydrogen bond and close contact residues for PFAS ligands bound to different LFABPs. The results were generated by Autodock vina (Trott and Olson 2010) and Autodock tools (Morris et al. 2009).

| Ligands | Japanese medaka |                                                                | Fathead minnow |                                                                | Human          |                                                            |
|---------|-----------------|----------------------------------------------------------------|----------------|----------------------------------------------------------------|----------------|------------------------------------------------------------|
|         | H-bond          | Close Contact                                                  | H-bond         | Close Contact                                                  | H-bond         | Close Contact                                              |
| PFBA    | ARG121          | ILE50, SER52, ARG121                                           | ARG113         | ILE42, SER44, ARG113                                           | ARG122, SER124 | SER39, ILE62, ILE109, ARG122, SER124                       |
| PFPA    | ARG121          | ILE50, SER52, ASN61, ARG121                                    | ARG113         | ILE42, SER44, ARG113                                           | ARG122, SER124 | SER39, ILE109, ARG122, SER124                              |
| PFHxA   | ARG121          | ASN61, PHE63, THR73, HIS99, ARG121                             | ARG113         | ILE42, THR65, ARG113                                           | ARG122, SER124 | SER39, PHE50, ILE109, ARG122, SER124                       |
| PFHpA   | ARG121          | ILE50, SER52, ASN61, PHE63, THR73, HIS99, ARG121               | ARG113         | ILE42, SER44, ASN53, PHE55, THR65, HIS91, ARG113               | ARG122, SER124 | SER39, PHE50, ILE109, ARG122, SER124                       |
| PFOA    | SER52, ARG121   | ILE50, SER52, PHE63, THR73, HIS99, ARG121                      | ARG113         | ILE42, SER44, ASN53, PHE55, ILE63, CYS84, HIS91, ARG113        | ARG122, SER124 | SER39, PHE50, PHE63, LEU91, THR102, ILE109, ARG122, SER124 |
| PFNA    | SER52, ARG121   | ILE50, SER52, ASN61, PHE63, ILE71, THR73, CYS92, HIS99, ARG121 | ARG113         | ILE42, SER44, ASN53, PHE55, ILE63, THR65, CYS84, HIS91, ARG113 | ARG122, SER124 | SER39, ILE41, PHE50, ILE52, PHE63, LEU91, ARG122, SER124   |
| PFBS    | THR73           | ILE50, ASN61, PHE63, THR73, HIS99, ARG121                      | -              | ILE42, ASN53, PHE55, HIS91, ARG113                             | ARG122, SER124 | SER39, ASN111, ARG122                                      |
| PFHxS   | ARG121          | SER52, ASN61, PHE63, THR73, HIS99, ARG121                      | ARG113         | SER44, ASN53, PHE55, THR65, HIS91, ARG113                      | ARG122, SER124 | SER39, PHE50, ILE109, ARG122, SER124                       |
| PFOS    | ARG121          | ILE50, SER52, ASN61, PHE63, ILE71, THR73, CYS92, HIS99, ARG121 | ARG113         | ILE42, SER44, ASN53, PHE55, ILE63, THR65, CYS84, HIS91, ARG113 | ARG122, SER124 | SER39, ILE41, PHE50, LEU91, THR102, ILE109, ARG122, SER124 |

## References

Doering, J. A., Lee, S., Kristiansen, K., Evenseth, L., Barron, M. G., Sylte, I., LaLone, C. A. (2018). In silico site-directed mutagenesis informs species-specific predictions of chemical susceptibility derived from the sequence alignment to predict across species susceptibility (SeqAPASS) tool. *Toxicol Sci.* 166(1), 131-145.

Morris, G. M., Huey, R., Lindstrom, W., Sanner, M. F., Belew, R. K., Goodsell, D. S., Olson, A. J. (2009). AutoDock 4 and AutoDockTools 4: automated docking with selective receptor flexibility. *J. Comput. Chem.* 30(16), 2785-2791.

Schrodinger, LLC. (2015). The PyMOL molecular graphics system, Version 1.8.

Trott, O., Olson, A. J. (2010). Autodock Vina: improving the speed and accuracy of docking with a new scoring function, efficient optimization, and multithreading. *J. Comput. Chem.* 31(2), 455-461.
